# Supplementary material for: Missing the input: the underrepresentation of plant physiology in global soil carbon research
Source: Copernicus journal article supplement (doi:10.5194/soil-11-363-2025), 2025-05-05
Supplement: Supplementary file [file soil-11-363-2025-supplement-title-page.pdf › soil-11-363-2025-supplement-title-page.pdf]

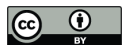

## *Supplement of*

# **Missing the input: the underrepresentation of plant physiology in global soil carbon research**

**Sajjad Raza et al.**

*Correspondence to:* Tino Colombi ([tino.colombi@nottingham.ac.uk](mailto:tino.colombi@nottingham.ac.uk))

- [soil-11-363-2025-supplement-title-page.pdf](#)
- Supplement
  - [RazaEtAl\\_BiblSOC\\_SupplementalDataS1.csv](#)
  - [RazaEtAl\\_BiblSOC\\_SupplementalTableFigures.pdf](#)
  - [ReadMe\\_\\_\\_\\_RazaEtAl\\_BiblSOC\\_SupplementalDataS1.txt](#)

The copyright of individual parts of the supplement might differ from the article licence.
